# Supplementary material for: Cathodoluminescence nanoscopy of open single-crystal aluminum plasmonic nanocavities
Source: Royal Society of Chemistry journal article supplement (doi:10.1039/c8nr06545d), 2018-01-01
Supplement: c8nr06545d1.pdf [file c8nr06545d1.pdf]

## Supporting information for Cathodoluminescence nanoscopy of open single-crystal aluminum plasmonic nanocavities

Li Li,<sup>1</sup> Wei Cai,<sup>1,\*</sup> Chenglin Du,<sup>1</sup> Zhongyuan Guan,<sup>2</sup> Yinxiao Xiang,<sup>1</sup> Wei  
Wu,<sup>1</sup> Mengxin Ren,<sup>1</sup> Xinzheng Zhang,<sup>1</sup> Aiwei Tang,<sup>2</sup> and Jingjun Xu<sup>1,†</sup>

<sup>1</sup>*The Key Laboratory of Weak-Light Nonlinear Photonics,  
Ministry of Education, School of Physics and TEDA Applied Physics Institute,  
Nankai University, Tianjin 300457, China*

<sup>2</sup>*Key Laboratory of Luminescence and Optical Information,  
Ministry of Education, School of Science,  
Beijing Jiaotong University, Beijing 100044, China*

(Dated: October 17, 2018)

---

\*Electronic address: [weicai@nankai.edu.cn](mailto:weicai@nankai.edu.cn)

†Electronic address: [jjxu@nankai.edu.cn](mailto:jjxu@nankai.edu.cn)

## I. REFLECTION OF SURFACE PLASMON POLARITONS BY THE ALUMINUM WALL

Surface plasmon polaritons (SPPs) are reflected by the aluminum wall with the height of  $h = 136$  nm. Two-dimension simulation is carried out, where an electric dipole polarized along  $x$ -axis is used to excite SPPs at the interface between aluminum and vacuum. The SPP wave is reflected by the aluminum wall. The reflectivity and reflection phase can be obtained by comparing the fields with and without the reflector, as shown in Fig. S1.

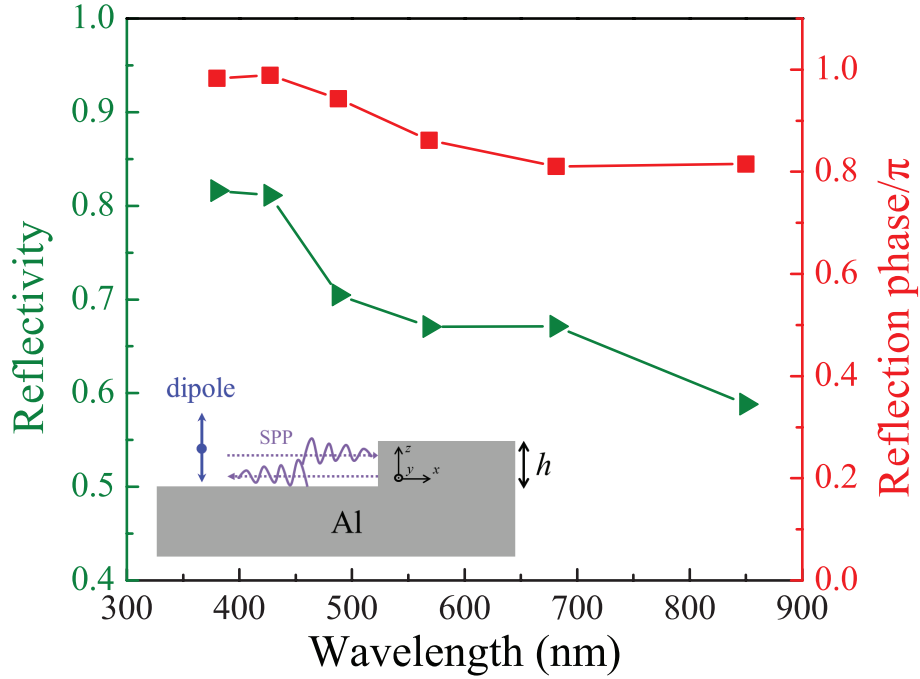

FIG. S1: Simulated reflectivity and reflection phase shift of the out-of-plane component of SPPs for the cavity reflectors. The height of the reflector is 136 nm.

## II. THE NORMAL MODES IN A TRIANGLE UNDER PERFECT ELECTRIC CONSTRUCTOR BOUNDARIES

The optical modes in an equilateral triangle cavity can be obtained analytically as long as the fields are efficiently reflected by the facets. For the TM mode, the electric field  $E_z(x, y)$

can be written as [1]

$$E_z(x, y) = A\{e^{ik_1x} \sin k_2(y + \frac{a}{2\sqrt{3}}) + Be^{-ik_1[(x+a)/2-\sqrt{3}y/2]} \sin k_2(\frac{\sqrt{3}}{2}x + \frac{y}{2} - \frac{a}{2\sqrt{3}}) + Ce^{-ik_1[(x-a)/2+\sqrt{3}y/2]} \sin k_2(\frac{\sqrt{3}}{2}x - \frac{y}{2} + \frac{a}{2\sqrt{3}})\} \quad (1)$$

where we have

$$\begin{aligned} k_1 &= \pm \frac{2m\pi}{3a}, m = 1, 2, 3... \\ k_2 &= \frac{2n\pi}{\sqrt{3}a}, n = 1, 2, 3... \\ B &= (-1)^{n+1}, C = (-1)^n \end{aligned} \quad (2)$$

As a result, the  $z$  component of field distribution for the first five modes are calculated and shown in Fig. S2. The field distribution are compared with the mode pattern obtained by cathodoluminescence mapping in the main text Fig. 2. Therefore, the mode index  $(m, n)$  can be determined.

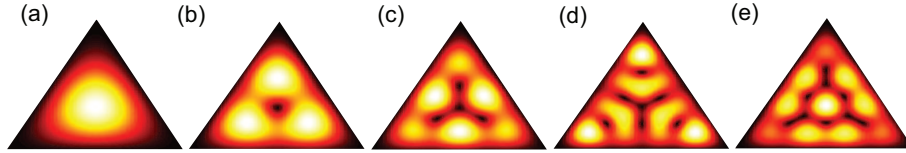

FIG. S2: The lowest five optical mode distribution  $E_z(x, y)$  in a triangle cavity. The side length of the cavity is 1083 nm.

- 
- [1] Chang, H. C.; Kioseoglou, G.; Lee, E. H.; Haetty, J.; Na, M. H.; Xuan, Y.; Luo, H.; Petrou, A.; Cartwright, A. N. *Phys. Rev. A* **2000**, *62*, 013816.
